# Supplementary material for: Factors Affecting the Patterns of Total Amount and Proportions of Leukocytes in Bovine Milk
Source: PubMed Central journal article supplement (PMC7341286; doi:10.3390/ani10060992), 2020-06-06
Supplement: animals-10-00992-s001.pdf [file animals-10-00992-s001.pdf]

**Supplementary materials**
**Table S1.** Main characteristics of the 12 herds included into the study.

| Herd | Samples (N) | Milk yield (Kg/d) | SCC <sup>1</sup> (log <sub>10</sub> /ml) | DSCC <sup>2</sup> (%) | P+LT <sup>3</sup> (Log <sub>10</sub> cells) |
|------|-------------|-------------------|------------------------------------------|-----------------------|---------------------------------------------|
| 1    | 1,267       | 38.16±8.63        | 4.66±0.30                                | 55.35±14.50           | 8.94±0.36                                   |
| 2    | 4,445       | 47.10±12.29       | 4.51±0.32                                | 52.86±15.99           | 8.87±0.39                                   |
| 3    | 1,067       | 35.78±7.81        | 4.55±0.32                                | 52.51±14.86           | 8.80±0.39                                   |
| 4    | 1,476       | 34.42±8.81        | 4.66±0.29                                | 56.11±15.32           | 8.92±0.35                                   |
| 5    | 1,202       | 27.56±7.88        | 4.68±0.27                                | 58.05±13.14           | 8.85±0.33                                   |
| 6    | 1,352       | 32.29±7.68        | 4.62±0.31                                | 54.96±14.03           | 8.84±0.37                                   |
| 7    | 1,168       | 27.07±6.35        | 4.86±0.25                                | 64.12±0.65            | 9.09±0.30                                   |
| 8    | 860         | 29.96±7.70        | 4.65±0.30                                | 57.70±14.55           | 8.85±0.37                                   |
| 9    | 1,379       | 34.43±9.66        | 4.061±0.32                               | 56.01±15.34           | 8.85±0.38                                   |
| 10   | 1,100       | 33.47±7.49        | 4.65±0.32                                | 57.78±14.73           | 8.91±0.39                                   |
| 11   | 1,128       | 31.59±7.72        | 4.63±0.30                                | 54.32±13.90           | 8.84±0.36                                   |
| 12   | 1,485       | 31.30±8.13        | 4.60±0.27                                | 54.69±13.74           | 8.81±0.34                                   |

<sup>1</sup>SCC = Somatic Cell Count; <sup>2</sup>DSCC = Differential leukocyte count; <sup>3</sup>P+LT is equal to SCC x milk yield x DSCC (as proportion)

**Table S2.** Distribution of samples within the two data subsets (healthy and diseased) ranked by parity and SCC.

| Status          | SCC <sup>1</sup> level | Parity |       |       |           | Total  |
|-----------------|------------------------|--------|-------|-------|-----------|--------|
|                 |                        | 1      | 2     | 3     | 4 or more |        |
| <i>healthy</i>  | ≤50,000                | 3,323  | 1,929 | 959   | 691       | 6,902  |
|                 | ≤100,000               | 4,801  | 2,948 | 1,587 | 1,145     | 10,481 |
|                 | ≤150,000               | 5,439  | 3,379 | 1,900 | 1,426     | 12,144 |
|                 | ≤200,000               | 5,765  | 3,642 | 2,088 | 1,592     | 13,087 |
| <i>diseased</i> | >200,000               | 1,455  | 1,316 | 988   | 1,093     | 4,852  |
|                 | >400,000               | 801    | 784   | 629   | 708       | 2,922  |
|                 | >800,000               | 431    | 448   | 361   | 456       | 1,696  |

<sup>1</sup>SCC = Somatic Cell Count

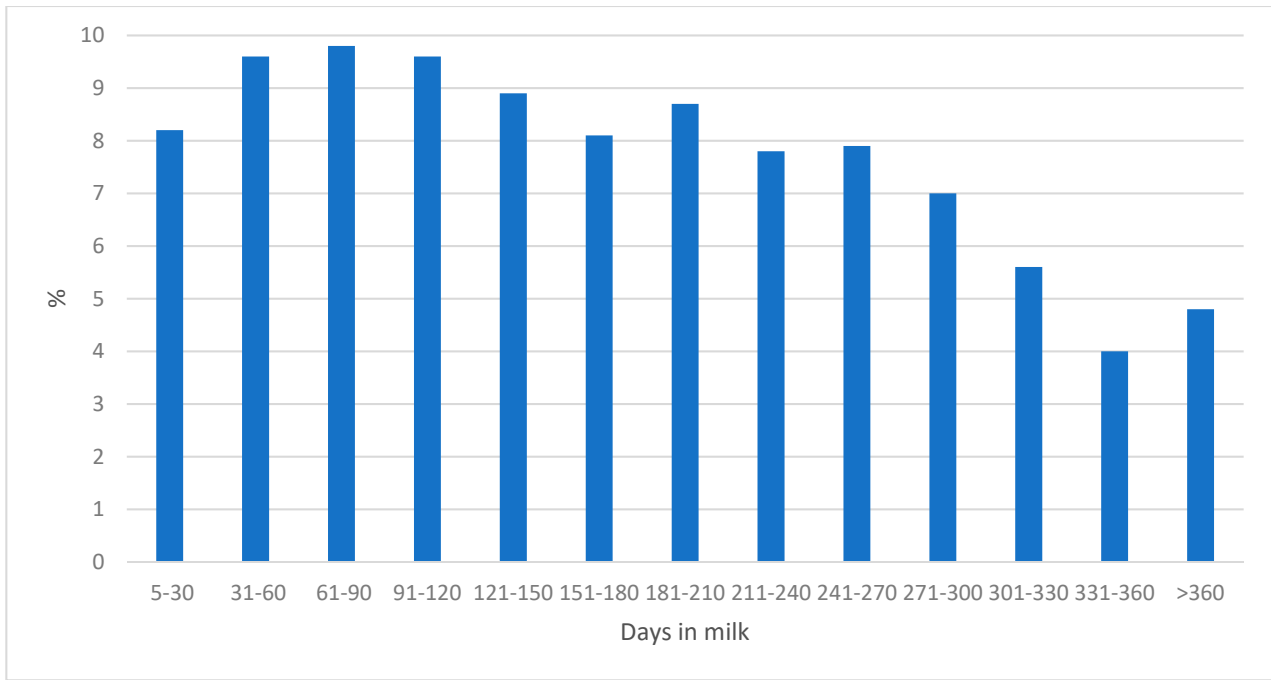

**Figure S1.** Distribution of samples by days in milk
